# 1 Title

2 Effect of translation enhancing nascent SKIK peptide on the arrest peptides containing  
3 consecutive Proline

# 5 Author List

6 Yuma Nishikawa, Riko Fujikawa, Hideo Nakano, Takashi Kanamori, Teruyo Ojima-Kato\*

7 \*, the person to whom correspondence

# 9 Abstract

10 Ribosome arrest peptides (RAPs) such as SecM arrest peptide (SecM AP) and WPPP with  
11 consecutive Pro residues, are known to induce translational stalling in *Escherichia coli*. We  
12 demonstrate that the translation enhancing SKIK peptide tag, which consisted of four amino  
13 acid residues Ser-Lys-Ile-Lys, effectively alleviate translational arrest caused by WPPP.  
14 Moreover, the proximity between SKIK and WPPP significantly influences the extent of this  
15 alleviation, observed in both PURE cell-free protein synthesis and in vivo protein production  
16 systems, resulting in a substantial increase in the yield of proteins containing such RAPs.  
17 Furthermore, we unveil that nascent SKIK peptide tag and translation elongation factor P  
18 (EF-P) which alleviate ribosome stalling in consecutive-Pro rich protein, synergistically  
19 promote translation. A kinetic analysis based on the generation of super folder green  
20 fluorescent protein under in vitro translation reaction reveals that the ribosome turnover is  
21 enhanced by more than 10-fold when the SKIK peptide tag is positioned immediately  
22 upstream of the SecM AP sequence. Our findings provide valuable insights into optimizing  
23 protein production processes, which are essential for advancing synthetic biology  
24 applications.

# 26 Keywords

27 polyproline, ribosome arrest peptides, SKIK, translation enhancement, EF-P

# 29 Introduction

30 Protein synthesis is a fundamental process in synthetic biology, and the translation by  
31 ribosomes is an essential step in protein synthesis. Nonetheless, achieving high productivity  
32 for all proteins of interest remains a challenge, often leading to encounters with  
33 difficult-to-express proteins for reasons yet to be fully elucidated. Addressing this issue  
34 necessitates considering various strategies. These include codon optimization<sup>1-6</sup>, loosening  
35 the secondary structure of mRNA<sup>7-9</sup>, utilizing a combination of host-vector systems  
36 comprising ribosome binding site (RBS), promoter, and terminator<sup>10-13</sup>. Furthermore,

co-expression of molecular chaperons<sup>14</sup>, and the use of fusion protein tags (e. g., maltose binding protein domain, glutathione S-transferase, small ubiquitin-related modifier) have proven beneficial<sup>15,16</sup>. optimizing culture conditions plays a pivotal role in enhancing productivity<sup>17-19</sup>.

Recently, some nascent polypeptides generated during the translation process have been reported as ribosome arrest peptides (RAPs), which cause translational stalling by interacting with internal components of the ribosome when they pass through the ribosome exit tunnel in the nascent state. RAP-mediated translation arrest is directed by the amino acid sequence of the nascent polypeptide chain instead of the mRNA nucleotide sequence. It is independent of codon usages or the secondary structure of mRNA<sup>21</sup>.

RAPs have been found in a variety of organisms, including SecM and CmlA leader in *E. coli*<sup>20-23</sup>, VemP in *Vibrio alginolyticus*<sup>24,25</sup>, and MifM in *Bacillus subtilis*<sup>26</sup>. Among them, SecM is the most studied, and the partial sequence F<sup>150</sup>XXXXWIXXXXGIRAGP<sup>166</sup> (X is any amino acid) at the C-terminus is required and sufficient for causing ribosomal stalling<sup>27</sup>, where new peptidyl bond formation is inhibited when the 166th Pro is going to be synthesized (P-site: SecM<sub>1-165</sub>-Gly-tRNA, A-site: Pro-tRNA) at the peptidyl-transferase center (PTC). Due to the structural rigidity and unique status as an N-alkylamino acid, Pro-tRNA at the A site slows down the peptidyl bond formation in the RAPs containing SecM and poly-Pro<sup>28</sup>. As such, the WPPP (FXXYXIWPPP: X is any amino acid) sequence, artificially created RAP, efficiently induces ribosomal stalling due to its consecutive Pro residues<sup>29,30</sup>. The universally conserved bacterial elongation factor called elongation factor P (EF-P, PDB 1UEB) is responsible for preventing the translational stalling caused by consecutive Pro in prokaryotic cells<sup>31-34</sup>. The shape and size of EF-P are similar to tRNA and it interacts with the ribosome via the E site in the PTC<sup>35-37</sup>. However, Woolstenhulme et al. showed that EF-P had little or no effect on stalling by the full-length WPPP AP (FXXYXIWPPP) and RXPP motif<sup>30</sup>.

We have previously reported that the insertion of an "SKIK peptide tag" composed of the four amino acids Ser-Lys-Ile-Lys at the N-terminus of difficult-to-express proteins, enhances protein production not only in both *E. coli* in vivo and in vitro systems but also in yeast<sup>38</sup>. More recently, we revealed that changing nucleotide sequences corresponding to these four amino acids had no effect on protein production and that the nascent SKIK peptide generated during the translation process could enhance the translation process, but not transcription<sup>39</sup>. Surprisingly, ribosomal stalling by RAPs such as SecM AP (FSTPVWISQAQGIRAGP) and chloramphenicol induced CmlA leader (KNAD) was canceled by a nascent SKIK peptide generated immediately upstream of the RAPs. Moreover, the combined investigation of the SKIK peptide tag and SecM AP suggested that the SKIK peptide, even when positioned internally within the protein, could enhance

translation. Additionally, it was suggested that the distance between SKIK and the AP motif might be crucial for SKIK to effectively alleviate translational stalling induced by RAPs. However, it should be noted that in our previous study, the SKIK peptide tag showed no significant impact on translation when it was positioned immediately upstream of the WPPP AP (FQKYGIWPPP)<sup>39</sup>. Based on our recent findings, we hypothesized that ribosomal stalling induced by RAPs containing a poly-Pro motif could be alleviated by optimizing the distance between the nascent SKIK peptide and the poly-Pro motif. In this study, we investigated the positional effects of the SKIK peptide tag on the ribosomal stalling caused by the poly-Pro AP motif in both *E. coli* in vitro and in vivo systems. Additionally, we uncovered that EF-P and the SKIK peptide tag synergistically enhance translation, resulting in a significant increase in protein production. Translation promotion was observed only when the SKIK peptide was tagged, not by adding the synthesized free SKIK peptide to the in vitro translation system, emphasizing the importance of the nascent state of the SKIK peptide in counteracting arrest. Furthermore, we performed a kinetic analysis using an in vitro translation system to elucidate how the SKIK peptide tag influences on translation.

89

## 90 **Results and Discussion**

### 91 **Influences of the distance between SKIK and WPPP arrest peptide**

As described above, the ribosomal stalling by WPPP (FQKYGIWPPP), an artificial AP containing consecutive Pro, was not affected by the SKIK peptide tagging while the ribosomal stalling by SecM AP was more effectively reduced when the SKIK peptide tag was positioned closer<sup>39</sup>. We therefore created DNA constructs corresponding to the amino acid sequence depicted in Figure 1 to explore the hypothesis that an optimal position for the SKIK peptide tag exists concerning the poly-Pro motif. Here, the SKIK tag positioned immediately before the reported AP motif (FQKYGIWPPP) of WPPP was designated as the standard (+0 aa). Minus and plus numbers indicate the count of deleted amino acid residues from F in the WPPP AP motif and inserted G, respectively. To confirm that only the four amino acids "WPPP" function as an arrestor, a version with -6 aa (SKIKWPPP), where the SKIK moiety was substituted with GGGG or AAAA, was also constructed.

In the results of in vitro translation using mRNA, the fluorescence intensity, reflecting the synthesized sfGFP quantity after 90 minutes of reaction, demonstrated a rising trend as the distance between SKIK and WPPP decreased (Figure 2A). Particularly noteworthy was the fluorescence intensity at -5 aa (28,860), where SKIK and WPPP AP were brought closer, being approximately 5 times higher than at +0 aa (5,660), indicating the effective alleviation of ribosomal stalling induced by poly-Pro by the SKIK peptide tag. Western blotting analysis

for His tag detection also revealed an increase in the full-length protein synthesis as the distance between SKIK and poly-Pro decreased. Moreover, insertions of G at +4–7 aa and +13 aa also exhibited approximately twice the fluorescence intensity of +0 aa, suggesting the possibility of multiple conditions where SKIK can effectively mitigate the ribosomal stalling caused by poly-Pro. It is worth noting that the fluorescence intensity for -6 aa (SKIKWPPP) was 20,200, whereas GGGG (sequence GGGGWPPP) and AAAA (AAAWPPP) exhibited significantly lower intensities. This indicates that the four amino acids WPPP alone can induce translational stalling, and SKIK counteracts this stalling. In the RAP employed in this study, the WPPP AP motif (FQKYGIWPPP), it was reported that the presence of F, Y, I, and W upstream of PPP is essential for translational arrest. However, Elgama et al. demonstrated that the strength of translation arrest induced by a poly-Pro motif is influenced by the specific amino acid residues immediately upstream<sup>40</sup>. This may support our findings that SKIK has the potential to alleviate translational arrest induced by poly-Pro, and its effectiveness seems to depend on the distance between SKIK and poly-Pro motif.

The translation rate, determined by monitoring the real-time synthesis of sfGFP from mRNA, correlated with the amount of the protein obtained after 90 minutes of reaction (Figure 2A, B). Hence, under the 90-minute CFPS conditions in this experiment, it can be inferred that the final protein amount is indeed influenced by the translation rate. Nevertheless, as the distance increased beyond "+8 aa," a declining trend in synthesis levels was observed. Upon comparison with the protein production levels of "GGGG," a sequence excluding SKIK, it can be inferred that translational arrest was alleviated in all sequences containing SKIK, albeit with varying degrees.

The more prominent trend of translational arrest alleviation observed in vivo may be attributed to the fact that in vitro reactions were only 90 minutes, while in vivo, we conducted longer expression induction. Additionally, the presence of natural EF-P in the living cells could contribute to this difference.

To the best of our knowledge, there have been no reports on function of the SKIK peptide to alleviate the ribosomal stalling by poly-Pro or on the importance of their positional relationship. Therefore, our findings will provide a critical and novel insight in the field of synthetic biology.

140

# **Kinetic analysis of the protein synthesis**

We then performed a kinetic analysis of translation to better understand the effect of the SKIK peptide tag on translation. Here, SecM AP-sfGFP with and without the SKIK peptide tag and simple translation reaction model were used (Figure 3A, B). For this analysis, we

145 designate mRNA as "Substrate (S)," sfGFP as "Product (P)," and ribosome as "Enzyme (E)"  
 146 for convenience. We applied the following three assumptions to simplify the analysis: 1)  
 147 there is no folding rate limitation for sfGFP, 2) there are sufficient elements necessary for  
 148 translation, and no molecules inhibit the translation reaction, and 3) mRNA and ribosome do  
 149 not dissociate until the translation of single protein molecule is completed.

150

151 The translation rate  $v$  was defined as follows.

$$152 \quad v = k_2 [ES] \quad (1)$$

153 The following equation is given by the steady-state approximation.

$$154 \quad [ES] = \frac{k_1}{k_2} [E][S] \quad (2)$$

155 On the other hand,  $[E]$  can be expressed as follows:

$$156 \quad [E] = [E]_0 - [ES] \quad (3)$$

157 The following equation can be derived by substituting (3) into (2).

$$158 \quad [ES] = \frac{[E]_0[S]}{k_2/k_1 + [S]} \quad (4)$$

159 Based on the assumption that  $k_2[E]_0 = V_{max}$ , substituting equation (1) into (4) results in a  
 160 Michaelis-Menten-like equation as follows:

$$161 \quad v = \frac{V_{max}[S]}{k_2/k_1 + [S]} \quad (5)$$

162 Where  $[S] = k_2/k_1$  when the translation rate is  $1/2 V_{max}$ .

163 The translation rate was assessed by continuously monitoring the fluorescence intensity of  
 164 sfGFP generated by CFPS using mRNA templates ranging from 0.316 to 24.2  $\mu\text{M}$ . As  
 165 shown in Figure 3C, the rate of sfGFP production escalated proportionally with the quantity  
 166 of mRNA template utilized. Based on these measurements, the translation rate was  
 167 calculated (Table 1). It was observed that the translation rate increased by over 10-fold  
 168 when the SKIK peptide was tagged, regardless of mRNA concentrations, peaking at a  
 169 maximum enhancement of 16.8-fold at 15.5  $\mu\text{M}$ .

170 Utilizing the translation rates calculated for each mRNA concentration in Table 2, nonlinear  
 171 regression analysis was conducted using the R package "renz"<sup>41</sup>(Figure 3D). The  
 172 regression curve aptly fits the experimental data, enabling the calculation of,  $V_{max}$  and  $k_2/k_1$   
 173 based on Equation (5). As a result, the  $V_{max}$  values for SKIK peptide tag absence and  
 174 presence were determined to be 0.20  $\text{mM}_{\text{GFP}}/\text{M}_{\text{Ribosome}}/\text{s}$  and 4.50  $\text{mM}_{\text{GFP}}/\text{M}_{\text{Ribosome}}/\text{s}$ ,  
 175 respectively. The addition of SKIK peptide tag led to a 22.5-fold increase in  $V_{max}$ .

176 The calculated  $k_2/k_1$  values were 8.45  $\mu\text{M}$  without SKIK and 21.9  $\mu\text{M}$  with SKIK,  
 177 representing a 2.59-fold increase upon SKIK peptide tag addition (Table 3).  $[E]_0 = 1 \mu\text{M}$  and  
 178  $V_{max} = k_2 [E]_0$  were used to calculate  $k_2$ , and subsequently,  $k_1$  was calculated from the  
 179 non-linear regression analysis-derived  $k_2/k_1$ . The results are also summarized in Table 3. As  
 180 evident from this, the addition of the SKIK peptide tag led to values of  $k_1$  and  $k_2$  that were  
 181 8.65-fold and 22.5-fold higher, respectively.  
 182 Since the RBS is the same in the two examined mRNA sequences, it seems unlikely that the  
 183 affinity between the ribosome and mRNA changes significantly. Therefore, the increase in  $k_1$   
 184 resulting from the addition of SKIK peptide tag suggests an augmentation in the pool of  
 185 ribosomes capable of initiating translation. Similarly, the increase in  $k_2$  implies an  
 186 acceleration in the rate of translation from initiation to termination. These kinetic analyses  
 187 indicate that the addition of the SKIK peptide tag could enhance the ribosomal turnover rate.  
 188 Regarding studies on kinetic analysis of translation, previous analyses have utilized the  
 189 incorporation of radiolabeled amino acids into synthesized proteins<sup>42</sup>, and more recently,  
 190 elongation rates per codon have been calculated based on ribosome density observed on  
 191 mRNA through ribosome profiling<sup>43,44</sup>. To our knowledge, our analysis, based on the  
 192 production of sfGFP as an indicator, has not been reported previously and is a first attempt.  
 193 Elongation rate per codon is commonly used as an indicator of translation efficiency, with  
 194 reported values ranging from 1.66 codons/s<sup>45</sup> and in *E. coli* in vivo to 10 codons/s<sup>42</sup> in vitro,  
 195 4.2 codons/s for *S. cerevisiae*, and 5.2 codons/s for mouse stem cells<sup>43</sup>  
 196 In this study, SKIK-SecM AP-sfGFP gene used consists of 267 codons. The apparent  
 197 elongation rate per codon calculated from the estimated  $V_{max}$  of SKIK-SecM AP-sfGFP was  
 198 1.2 codons/s. Although this value is lower than those reported in previous studies,  
 199 considering that ribosomal stalling by SecM is not completely alleviated by SKIK peptide tag  
 200<sup>39</sup>, and our reaction model disregards the translation initiation and termination stages which  
 201 require time, the calculated elongation rate appears reasonable. Although it should be noted  
 202 that use of this model might be limited, we concluded that the simple translation rate  
 203 analysis method proposed in this study worked well for our purpose.

204

## 205 **Effect of EF-P and SKIK peptide**

206 EF-P is a translation factor reported to promote the synthesis of poly-Pro motif. Therefore,  
 207 we investigated how the SKIK peptide tag, capable of relieving ribosomal stalling induced by  
 208 poly-Pro, and EF-P, would affect the translation of sequences containing poly-Pro. We  
 209 examined using four sequences including -5 aa, +0 aa, GGGG, and AAAA. Among these,  
 210 the ribosomal stalling was most effectively alleviated by SKIK peptide tag alone in -5 aa  
 211 (Figure 2A). As a result of EF-P addition at a final concentration of 1  $\mu\text{M}$ , the protein

production was increased to 1.51-fold and 4.40-fold in -5 aa and +0 aa, respectively, compared with no additive. In particular, the protein production was highest for -5 aa with EF-P, indicating a synergistic effect by SKIK peptide tag and EF-P (Figure 4A). It suggests the possibly that EF-P and SKIK peptide tag individually promote translation in this case. By contrast, GGGG and AAAA, which do not contain SKIK, did not show any change in protein levels with addition of EF-P. To confirm the nascent state of SKIK peptide is essential for translation promotion, CFPS of four mRNA templates was conducted with the addition of the chemically synthesized free SKIK peptides at 100  $\mu$ M which was 100 times higher concentration of ribosome in CFPS reaction. As expected, no influence was observed (Figure 4B). Huter et al. demonstrated that EF-P recognizes the P-site tRNA and the E-site mRNA codon, stabilizing the conformation of the P-site tRNA and thereby promoting peptidyl bond formation<sup>46</sup>. Taken together with the results of additional of free SKIK peptide and our previous study<sup>39</sup>, it is likely that nascent state of SKIK peptide tag is crucial for translation promotion. Therefore, we expect that the mechanism of action of externally functioning EF-P and SKIK peptide tag at the nascent state may be different. Since the mechanism of translation enhancement by SKIK peptide tag has not yet been elucidated, we believe that further structural analysis will be necessary.

## Conclusions

In this study, we revealed that the translation enhancing SKIK peptide tag effectively alleviates ribosomal stalling induced by the WPPP when the distance between them is closer in both the PURE cell-free protein synthesis and in vivo protein production systems, resulting in significant increment of production of proteins containing such poly-Pro motif. A kinetic analysis based on the simple translation model showed that the ribosome turnover is enhanced by more than 10-fold when the SKIK peptide tag. Furthermore, we found that the use of both SKIK peptide tag and EF-P synergistically enhanced translation for proteins containing poly-Pro. Our findings and simple strategy have practical significance in enhancing protein production and contribute to the advancement of synthetic biology.



## 246 **Figure Legends**

### 247 **Figure 1. DNA constructs used to study the distance between the SKIK peptide tag** 248 **and poly-Pro motif of WPPP.**

249 The amino acid sequences including start M encoded immediately upstream of sfGFP are  
250 shown. SKIK and inserted G are shown in red and gray, respectively.

### 252 **Figure 2. Influences of the distance between SKIK peptide and WPPP poly-Pro motif** 253 **on protein production and translation rate.**

254 The sample names and sequences are corresponding to those of Figure 1.

- 255 A) Fluorescence intensity and Western blotting analysis of sfGFP detecting His tag. In  
256 vitro translation was carried out using mRNA templates (1.66  $\mu$ M) for 90 min (n = 2).
- 257 B) Translation rate calculated from the real-time monitoring of the fluorescence intensity  
258 of the generated sfGFP during in vitro translation (n = 2, mRNA concentration; 1.66  
259  $\mu$ M).
- 260 C) Fluorescence intensity of the produced sfGFP in *E. coli* BL21(DE3) living cell  
261 expression system (n = 6). SDS-PAGE and CBB staining analysis of the sfGFP bands  
262 are shown.

### 264 **Figure 3. Kinetic analysis of translation by PURE cell-free protein synthesis.**

- 265 A) mRNA constructs and amino acid sequences of SecM AP and SKIK-SecM AP.
- 266 B) Translation reaction model: E, S, and P represent the ribosome, mRNA, and sfGFP  
267 (product), respectively.  $k_1$  and  $k_2$  denote the rate constants for the reactions indicated  
268 by the respective arrows. The ES complex encompasses all stages from initiation to  
269 termination of translation.
- 270 C) Real-time fluorescence intensity measurements. Generation of sfGFP of various  
271 mRNA concentrations was monitored during 90min (5,400 s) CFPS reaction. Plus and  
272 minus in the parentheses indicate the presence and absence of the SKIK peptide tag,  
273 respectively.
- 274 D) Non-linear regression analysis of translation rate.

### 276 **Figure 4. Effect of EF-P and free SKIK peptide on protein production in CFPS.**

- 277 A) Fluorescence intensity of sfGFP by in vitro translation using mRNA (1.61  $\mu$ M) after 90  
278 min reaction. +/- indicates the presence/absence of EF-P (1  $\mu$ M).
- 279 B) Fluorescence intensity of sfGFP by in vitro translation using mRNA after 90 min  
280 reaction. The mRNA concentration was 1.19  $\mu$ M except for SecM AP and SKIK-SecM



281 AP (2.37  $\mu$ M). +/- indicates the presence/absence of synthesized free SKIK peptide  
282 (100  $\mu$ M).  
283  
284

285 **Tables**

286 **Table 1. Translation rate**

| mRNA ( $\mu\text{M}$ ) | $v$ ( $\text{mM}_{\text{GFP}}/\text{M}_{\text{Ribosome}}/\text{s}$ ) |                       | $V_{\text{SKIK}}/V_{\text{No tag}}$ |
|------------------------|----------------------------------------------------------------------|-----------------------|-------------------------------------|
|                        | No tag                                                               | SKIK                  |                                     |
| 24.2                   | 0.157                                                                | 2.25                  | 14.3                                |
| 15.5                   | 0.121                                                                | 2.02                  | 16.8                                |
| 10.7                   | $9.73 \times 10^{-2}$                                                | 1.61                  | 16.5                                |
| 6.33                   | 0.105                                                                | 0.823                 | 7.82                                |
| 3.16                   | $5.38 \times 10^{-2}$                                                | 0.514                 | 9.56                                |
| 1.58                   | $2.69 \times 10^{-2}$                                                | 0.292                 | 10.9                                |
| 0.316                  | $5.48 \times 10^{-3}$                                                | $5.72 \times 10^{-2}$ | 10.4                                |
| No template            | $9.52 \times 10^{-4}$                                                |                       |                                     |

287 The translation rate,  $v$ , calculated from the plot shown in Figure 3D, and the ratio of  $v$  with  
 288 and without SKIK are presented as  $V_{\text{SKIK}}/V_{\text{No tag}}$ . No tag and SKIK mean SecM AP-sfGF and  
 289 SKIK-SecM AP-sfGFP, respectively.

290

291

292 **Table 2. Parameters on translation calculated based on real-time translation**  
 293 **monitoring.**

|                        | $V_{\max}$<br>( $\text{mM}_{\text{GFP}} \cdot \text{M}_{\text{Ribosome}}^{-1} \cdot \text{s}^{-1}$ ) | $k_2/k_1$<br>( $\mu\text{M}$ ) | $k_1$              | $k_2$              |
|------------------------|------------------------------------------------------------------------------------------------------|--------------------------------|--------------------|--------------------|
| No tag                 | 0.20                                                                                                 | 8.45                           | $2.37 \times 10^7$ | $0.20 \times 10^3$ |
| SKIK                   | 4.50                                                                                                 | 21.9                           | $20.5 \times 10^7$ | $4.50 \times 10^3$ |
| SKIK/No tag<br>(-fold) | 22.5                                                                                                 | 2.59                           | 8.65               | 22.5               |

294  $V_{\max}$  and  $k_2/k_1$  were calculated using non-linear regression analysis with the renz software,  
 295 as shown in Figure 3D. The rate constants  $k_1$  and  $k_2$  were estimated from the values of  $V_{\max}$   
 296 and  $k_2/k_1$  obtained through the non-linear regression analysis. The units of  $k_1$  and  $k_2$  are  
 297  $\text{M}_{\text{GFP}} \cdot \text{M}_{\text{Ribosome}}^{-2} \cdot \text{s}^{-1} \cdot \text{M}_{\text{mRNA}}^{-1}$  and  $\text{M}_{\text{GFP}} \cdot \text{M}_{\text{Ribosome}}^{-2} \cdot \text{s}^{-1}$ , respectively.  $\text{M}_{\text{Ribosome}}$  and  $\text{M}_{\text{mRNA}}$   
 298 represent the concentrations of ribosome and mRNA in mol/L, respectively.  
 299

## 300 **Methods**

### 301 **DNA primer list**

302 DNA primers used in this research are summarized in Supplementary Table 1.

303

### 304 **Plasmid construction**

305 Total 21 plasmids were prepared by whole plasmid PCR using our previously constructed  
306 pET22b-SKIK-WPPP-sfGFP-His as the template and DNA primers listed in Supplementary  
307 Table 1. *DpnI* treated PCR products were purified with silica column (FastGene Gel/PCR  
308 Extraction Kit, Nippon Genetics Co., Ltd., Tokyo, Japan) and then HiFi assembly reaction  
309 (New England Biolabs, Ipswich, MA) was carried out to connect each end of linear DNA  
310 products. The plasmids were prepared using plasmid mini prep kit (FastGene Plasmid Mini  
311 Kit, Nippon Genetics Co., Ltd.) from overnight cultured *E. coli* DH5alpha transformants. The  
312 sequences of all plasmids confirmed by Sangar sequencing are available in Supporting  
313 Information.

314

### 315 **Cell-free protein synthesis (CFPS).**

316 DNA fragments containing T7 promoter and terminator used for CFPS were prepared by  
317 PCR with the primer pair F1 and R1, constructed plasmids as the template, and Tks Gflex  
318 DNA polymerase (98°C 1 min; (98°C 10 sec; 50°C 5 sec; 68°C 30 sec) × 30 cycles; 68°C  
319 1min; 12°C ∞, Takara, Kusatsu, Japan). Amplified DNA was purified using silica column and  
320 used for in vitro mRNA synthesis. For in vitro mRNA synthesis, the T7 RiboMAX  
321 Large-Scale RNA Production System (Promega, Madison, WI, USA) was used and the  
322 synthesized mRNAs were purified with NucleoSpin RNA Plus (Takara). The concentration of  
323 mRNA was measured by Nano Drop One (Thermo Fisher scientific, MA, USA) and the  
324 molecular weight were calculated using RNA Molecular Weight Calculator on AAT Bioquest  
325 (<https://www.aatbio.com>).

326 CFPS reactions were carried out with PUREflex 2.1 (GeneFrontier Corporation, Kashiwa,  
327 Japan) under the following condition. Solution I, 4 µL; Solution II, 0.5 µL; Solution III (20 µM  
328 ribosome), 0.5 µL; 10 mM cysteine, 0.5 µL; RNase Inhibitor (TOYOBO, Osaka, Japan), 1  
329 µL; at final reaction volume of 10 µL; incubated at 37°C for 90 min. The final concentration of  
330 the template mRNA depends on the examination. An elongation factor EF-P (GeneFrontier  
331 Corporation) and synthesized SKIK peptide dissolved in nuclease-free water (94.6% purity,  
332 GenScript, Tokyo) was added to achieve a final concentration of 1 µM and 100 µM,  
333 respectively, as needed.

334

### 335 **In vivo expression**

336 Terrific broth (Bacto tryptone, 12 g; yeast extract, 24 g;  $\text{KH}_2\text{PO}_4$ , 6.8 g;  $\text{Na}_2\text{PO}_4 \cdot 12\text{H}_2\text{O}$ , 7.1  
337 g;  $\text{MgSO}_4$ , 0.15 g;  $(\text{NH}_4)_2\text{SO}_4$ , 2.58 g; 10%(w/v) glucose, 5 mL; and 8%(w/v) lactose; 25 mL,  
338 per 1 L, adjusted pH 7.4) was used as the autoinduction medium. The single colonies of  
339 ECOS *E. coli* BL21(DE3) (Nippon Gene, Tokyo, Japan) transformed with each plasmid were  
340 inoculated to 4 mL of LB liquid and grown with shake at 37°C for 19 h. Then the aliquots (50  
341  $\mu\text{L}$ ) were transferred to the 1 mL of terrific broth and cultured at 30°C until the OD600  
342 reached 2.3–6.9. All media were supplemented with 100  $\mu\text{g}/\text{mL}$  ampicillin. After collecting  
343 the bacterial cells by centrifugation and washing with phosphate buffer saline buffer (PBS,  
344 137 mM NaCl, 2.7 mM KCl, 10 mM  $\text{Na}_2\text{HPO}_4$ , 1.8 mM  $\text{KH}_2\text{PO}_4$ ; pH 7.4), the OD600 values  
345 of each sample were adjusted to the same. Protein was extracted from the cells using  
346 *E.coli*/Yeast Protein Extraction Buffer (Tokyo Chemical Industry Co., Ltd., Tokyo, Japan),  
347 and the lysate fraction was used for analysis.

348

### 349 **Preparation of Standard sfGFP**

350 ECOS *E. coli* BL21(DE3) was transformed with pET22b-sfGFP-His and cultured in 100 mL  
351 of LB medium at 37°C with shake until the OD600 value reached 0.4–0.6. IPTG was then  
352 added at a final concentration of 0.1 mM and cultured at 37°C for another 5 h. Bacterial cells  
353 were collected by centrifugation (4°C, 9000 rpm, 10 min), resuspended in 10 mL of PBS,  
354 and then the bacteria were crushed by sonication (30 min). The supernatant of the lysate  
355 was applied to a Ni-NTA agarose HP column (Fujifilm Wako Pure Chemical Corporation,  
356 Osaka, Japan) equilibrated with Binding buffer (20 mM sodium phosphate buffer, 0.5 M  
357 NaCl, 20 mM imidazole, pH 8.0), and the column was washed 3 times with 6 mL of binding  
358 buffer and eluted 6 times with 1 mL of Elution buffer (20 mM sodium phosphate buffer, 0.5 M  
359 NaCl, 500 mM imidazole, pH 8.0). The eluate was added to the dialysis membrane and  
360 dialyzed for a total of 24 h (buffer was changed twice during the dialysis). The concentration  
361 of purified sfGFP was calculated from the A280 nm value (A.U.) measured by Nano Drop  
362 One. Molecular weight (27788.3 Da) and molar extinction coefficient ( $19,035 \text{ M}^{-1}\text{cm}^{-1}$ ) of  
363 sfGFP were calculated using ProtParam tool on Expasy (<https://www.expasy.org>)<sup>47</sup>.

364

### 365 **Fluorescence measurement**

366 Each CFPS reaction solution was diluted 25-fold with water and dispensed 50  $\mu\text{L}$  per well  
367 into Flat Bottom Microfluor Plates Black (Thermo Fisher scientific, MA, USA), and the  
368 fluorescence intensity of sfGFP was measured by a microplate reader (Infinite 200 PRO,

TECAN, ZH, Switzerland) at excitation wavelength 485 nm (bandwidth 9 nm)/emission wavelength of 535 nm (bandwidth 20 nm).

### **Real-time monitoring of the translation in CFPS**

The reaction was performed using a real-time PCR system (StepOnePlus Real-Time PCR System, Life Technologies, CA, USA) by incubating at 37°C, and the fluorescence intensity was measured every minute after 30 s. Fluorescence intensity per sfGFP molecule was calculated using purified sfGFP (14.6 μM, 1.46 μM, 0.146 μM, 0.0146 μM, and 0.00146 μM) as the standard. Translation rate defined as the generated sfGFP per ribosome per time was calculated from the rate of the fluorescence increase where the slope was the greatest and linear for all samples.

### **Western Blotting**

The samples (1 μL) were subjected to SDS-PAGE and transferred to a nitro cellulose membrane (Bio-Rad Laboratories, CA, USA). The membrane was blocked using 3% skim milk in PBST (137 mM NaCl, 2.7 mM KCl, 10 mM Na<sub>2</sub>HPO<sub>4</sub>, 1.8 mM KH<sub>2</sub>PO<sub>4</sub>, 0.05 % Tween-20; pH 7.4) for 1 h at room temperature. After washing three times with PBST, the membrane was incubated with Anti-His-tag mAb-HRP-DirectT (MBL, Tokyo, Japan) at 1:5000 dilution with Can Get Signal Solution 2 (Toyobo, Osaka, Japan) for 1 h at room temperature. After washing with PBST three times, blots were visualized with TMB solution (Nacalai tesque, Kyoto, Japan).

### **Supporting Information**

The Supporting Information including DNA sequences for plasmid with GenBank format and additional experimental data (PDF) is available free of charge.

### **Author Information**

#### **Corresponding author**

**Teruyo Ojima-Kato** - Laboratory of Molecular Biotechnology, Graduate School of Bioagricultural Sciences, Nagoya University, Furo-cho, Chikusa-ku, Nagoya 464-8601, Japan  
<https://orcid.org/0000-0001-5290-5176>; E-mail: [teruyo@agr.nagoya-u.ac.jp](mailto:teruyo@agr.nagoya-u.ac.jp)

### **Authors**

403 **Yuma Nishikawa** - Laboratory of Molecular Biotechnology, Graduate School of  
 404 Bioagricultural Sciences, Nagoya University, Furo-cho, Chikusa-ku, Nagoya 464-8601,  
 405 Japan  
 406 **Riko Fujikawa** - Laboratory of Molecular Biotechnology, Graduate School of Bioagricultural  
 407 Sciences, Nagoya University, Furo-cho, Chikusa-ku, Nagoya 464-8601, Japan  
 408 **Hideo Nakano** - Laboratory of Molecular Biotechnology, Graduate School of Bioagricultural  
 409 Sciences, Nagoya University, Furo-cho, Chikusa-ku, Nagoya 464-8601, Japan  
 410 <https://orcid.org/0000-0001-6133-9794>  
 411 **Takashi Kanamori** - GeneFrontier Corporation, 273-1 Kashiwa, Kashiwa, Chiba 277-0005,  
 412 Japan  
 413 <https://orcid.org/0000-0001-9150-5968>  
 414

#### 415 **Author contributions**

416 Y.N., H.N., T.K., and T.O.K. designed the study and analyzed the data. Y.N. performed  
 417 CFPS experiments. R.F. performed in vivo expression experiments. Y.N. and T.O.K. wrote  
 418 the manuscript. T.O.K. supervised the project.  
 419

#### 420 **Acknowledgment**

421 This research was supported by Japan Science and Technology agency FOREST Program  
 422 (grant No. JPMJFR2204), KAKENHI 23K04989, and GteXProgram Japan Grant Number  
 423 JPMJGX23B6 and JPMJGX23B4. PURE<sup>flex</sup> 2.1 and supplemental components used in this  
 424 study were provided by GeneFrontier Corporation. We thank Mrs. Kana Yamauchi (Nagoya  
 425 University) for her help to the preparation of the purified sfGFP. We also thank Prof. Hisashi  
 426 Hemmi (Nagoya University) and Prof. Tomokazu Ito (Nagoya University) for their kind  
 427 advice and help on translation analysis.  
 428

#### 429 **Abbreviations**

430 RAP, Ribosomal arrest peptide  
 431 RBS, ribosome binding site  
 432 PTC, peptidyl-transferase center  
 433 CFPS, cell-free protein synthesis  
 434 sfGFP, superfolder green fluorescent protein  
 435



## References

- 436 (1) Makrides, S. C. Strategies for Achieving High-Level Expression of Genes in  
437 Escherichia Coli. *Microbiol Rev* **1996**, 60 (3).  
438 <https://doi.org/10.1128/mr.60.3.512-538.1996>.
- 439 (2) Gvritishvili, A. G.; Leung, K. W.; Tombran-Tink, J. Codon Preference Optimization  
440 Increases Heterologous PEDF Expression. *PLoS One* **2010**, 5 (11).  
441 <https://doi.org/10.1371/journal.pone.0015056>.
- 442 (3) Bentele, K.; Saffert, P.; Rauscher, R.; Ignatova, Z.; Blüthgen, N. Efficient Translation  
443 Initiation Dictates Codon Usage at Gene Start. *Mol Syst Biol* **2013**, 9.  
444 <https://doi.org/10.1038/msb.2013.32>.
- 445 (4) Wu, X.; Jörnvall, H.; Berndt, K. D.; Oppermann, U. Codon Optimization Reveals  
446 Critical Factors for High Level Expression of Two Rare Codon Genes in Escherichia  
447 Coli: RNA Stability and Secondary Structure but Not tRNA Abundance. *Biochem*  
448 *Biophys Res Commun* **2004**, 313 (1). <https://doi.org/10.1016/j.bbrc.2003.11.091>.
- 449 (5) Saito, Y.; Kitagawa, W.; Kumagai, T.; Tajima, N.; Nishimiya, Y.; Tamano, K.; Yasutake,  
450 Y.; Tamura, T.; Kameda, T. Developing a Codon Optimization Method for Improved  
451 Expression of Recombinant Proteins in Actinobacteria. *Sci Rep* **2019**, 9 (1).  
452 <https://doi.org/10.1038/s41598-019-44500-z>.
- 453 (6) Gingold, H.; Dahan, O.; Pilpel, Y. Dynamic Changes in Translational Efficiency Are  
454 Deduced from Codon Usage of the Transcriptome. *Nucleic Acids Res* **2012**, 40 (20),  
455 10053–10063. <https://doi.org/10.1093/nar/gks772>.
- 456 (7) Jana, S.; Deb, J. K. Strategies for Efficient Production of Heterologous Proteins in  
457 Escherichia Coli. *Applied Microbiology and Biotechnology*. 2005.  
458 <https://doi.org/10.1007/s00253-004-1814-0>.
- 459 (8) Emory, S. A.; Bouvet, P.; Belasco, J. G. A 5'-Terminal Stem-Loop Structure Can  
460 Stabilize mRNA in Escherichia Coli. *Genes Dev* **1992**, 6 (1).  
461 <https://doi.org/10.1101/gad.6.1.135>.
- 462 (9) Frederick, M. I.; Heinemann, I. U. Regulation of RNA Stability at the 3' End. *Biological*  
463 *Chemistry*. 2021. <https://doi.org/10.1515/hsz-2020-0325>.
- 464 (10) Gold, L. Posttranscriptional Regulatory Mechanisms in Escherichia Coli. *Annual*  
465 *Review of Biochemistry*. 1988. <https://doi.org/10.1146/annurev.bi.57.070188.001215>.
- 466 (11) De Smit, M. H.; Van Duin, J. Secondary Structure of the Ribosome Binding Site  
467 Determines Translational Efficiency: A Quantitative Analysis. *Proc Natl Acad Sci U S*  
468 *A* **1990**, 87 (19). <https://doi.org/10.1073/pnas.87.19.7668>.
- 469

- 470 (12) Hall, M. N.; Gabay, J.; Débarbouillé, M.; Schwartz, M. A Role for mRNA Secondary  
471 Structure in the Control of Translation Initiation. *Nature* **1982**, 295 (5850).  
472 <https://doi.org/10.1038/295616a0>.
- 473 (13) Kastelein, R. A.; Berkhout, B.; Van Duin, J. Opening the Closed Ribosome-Binding  
474 Site of the Lysis Cistron of Bacteriophage MS2. *Nature* **1983**, 305 (5936).  
475 <https://doi.org/10.1038/305741a0>.
- 476 (14) Kyratsous, C. A.; Silverstein, S. J.; DeLong, C. R.; Panagiotidis, C. A.  
477 Chaperone-Fusion Expression Plasmid Vectors for Improved Solubility of  
478 Recombinant Proteins in Escherichia Coli. *Gene* **2009**, 440 (1–2).  
479 <https://doi.org/10.1016/j.gene.2009.03.011>.
- 480 (15) Marblestone, J. G. Comparison of SUMO Fusion Technology with Traditional Gene  
481 Fusion Systems: Enhanced Expression and Solubility with SUMO. *Protein Science*  
482 **2006**, 15 (1), 182–189. <https://doi.org/10.1110/ps.051812706>.
- 483 (16) LaVallie, E. R.; McCoy, J. M. Gene Fusion Expression Systems in Escherichia Coli.  
484 *Curr Opin Biotechnol* **1995**, 6 (5). [https://doi.org/10.1016/0958-1669\(95\)80083-2](https://doi.org/10.1016/0958-1669(95)80083-2).
- 485 (17) Corisdeo, S.; Wang, B. Functional Expression and Display of an Antibody Fab  
486 Fragment in Escherichia Coli: Study of Vector Designs and Culture Conditions.  
487 *Protein Expr Purif* **2004**, 34 (2). <https://doi.org/10.1016/j.pep.2003.11.020>.
- 488 (18) Gupta, P.; Sahai, V.; Bhatnagar, R. Enhanced Expression of the Recombinant Lethal  
489 Factor of Bacillus Anthracis by Fed-Batch Culture. *Biochem Biophys Res Commun*  
490 **2001**, 285 (4). <https://doi.org/10.1006/bbrc.2001.5282>.
- 491 (19) Yee, L.; Blanch, H. W. Recombinant Protein Expression in High Cell Density  
492 Fed-Batch Cultures of Escherichia Coli. *Bio/Technology* **1992**, 10 (12).  
493 <https://doi.org/10.1038/nbt1292-1550>.
- 494 (20) Muto, H.; Nakatogawa, H.; Ito, K. Genetically Encoded but Nonpolypeptide  
495 Prolyl-TRNA Functions in the A Site for SecM-Mediated Ribosomal Stall. *Mol Cell*  
496 **2006**, 22 (4), 545–552. <https://doi.org/10.1016/j.molcel.2006.03.033>.
- 497 (21) Nakatogawa, H.; Ito, K. *Secretion Monitor, SecM, Undergoes Self-Translation Arrest*  
498 *in the Cytosol the Export Status of SecM Affects Translation of SecA Encoded in the*  
499 *Same Messenger RNA Strand. The Cis-Specific Effect Suggests That the SecM*  
500 *Translocation In*; 2001; Vol. 7.
- 501 (22) Lovett, P. S. Translation Attenuation Regulation of Chloramphenicol Resistance in  
502 Bacteria - A Review. *Gene* **1996**, 179 (1).  
503 [https://doi.org/10.1016/S0378-1119\(96\)00420-9](https://doi.org/10.1016/S0378-1119(96)00420-9).
- 504 (23) Ishii, E.; Chiba, S.; Hashimoto, N.; Kojima, S.; Homma, M.; Ito, K.; Akiyama, Y.; Mori,  
505 H.; Randall, L. L. Nascent Chain-Monitored Remodeling of the Sec Machinery for

506 Salinity Adaptation of Marine Bacteria. *Proc Natl Acad Sci U S A* **2015**, 112 (40).  
507 <https://doi.org/10.1073/pnas.1513001112>.  
508 (24) Mori, H.; Sakashita, S.; Ito, J.; Ishii, E.; Akiyama, Y. Identification and Characterization  
509 of a Translation Arrest Motif in VemP by Systematic Mutational Analysis. *Journal of*  
510 *Biological Chemistry* **2018**, 293 (8), 2915–2926.  
511 <https://doi.org/10.1074/jbc.M117.816561>.  
512 (25) Kolář, M. H.; Nagy, G.; Kunkel, J.; Vaiana, S. M.; Bock, L. V.; Grubmüller, H. Folding  
513 of VemP into Translation-Arresting Secondary Structure Is Driven by the Ribosome  
514 Exit Tunnel. *Nucleic Acids Res* **2022**, 50 (4), 2258–2269.  
515 <https://doi.org/10.1093/nar/gkac038>.  
516 (26) Chiba, S.; Lamsa, A.; Pogliano, K. A Ribosome-Nascent Chain Sensor of Membrane  
517 Protein Biogenesis in *Bacillus Subtilis*. *EMBO Journal* **2009**, 28 (22).  
518 <https://doi.org/10.1038/emboj.2009.280>.  
519 (27) Nakatogawa, H.; Ito, K. The Ribosomal Exit Tunnel Functions as a Discriminating  
520 Gate. *Cell* **2002**, 108 (5), 629–636. [https://doi.org/10.1016/S0092-8674\(02\)00649-9](https://doi.org/10.1016/S0092-8674(02)00649-9).  
521 (28) Pavlov, M. Y.; Watts, R. E.; Tan, Z.; Cornish, V. W.; Ehrenberg, M.; Forster, A. C. *Slow*  
522 *Peptide Bond Formation by Proline and Other N-Alkylamino Acids in Translation*;  
523 2008. [www.pnas.org/cgi/doi/10.1073/pnas.0809211106](http://www.pnas.org/cgi/doi/10.1073/pnas.0809211106).  
524 (29) Tanner, D. R.; Cariello, D. A.; Woolstenhulme, C. J.; Broadbent, M. A.; Buskirk, A. R.  
525 Genetic Identification of Nascent Peptides That Induce Ribosome Stalling. *Journal of*  
526 *Biological Chemistry* **2009**, 284 (50). <https://doi.org/10.1074/jbc.M109.039040>.  
527 (30) Woolstenhulme, C. J.; Parajuli, S.; Healey, D. W.; Valverde, D. P.; Petersen, E. N.;  
528 Starosta, A. L.; Guydosh, N. R.; Johnson, W. E.; Wilson, D. N.; Buskirk, A. R. Nascent  
529 Peptides That Block Protein Synthesis in Bacteria. *Proc Natl Acad Sci U S A* **2013**,  
530 110 (10). <https://doi.org/10.1073/pnas.1219536110>.  
531 (31) Doerfel, L. K.; Wohlgemuth, I.; Kothe, C.; Peske, F.; Urlaub, H.; Rodnina, M. V. EF-P  
532 Is Essential for Rapid Synthesis of Proteins Containing Consecutive Proline Residues.  
533 *Science (1979)* **2013**, 339 (6115). <https://doi.org/10.1126/science.1229017>.  
534 (32) Ude, S.; Lassak, J.; Starosta, A. L.; Kraxenberger, T.; Wilson, D. N.; Jung, K.  
535 Translation Elongation Factor EF-P Alleviates Ribosome Stalling at Polyproline  
536 Stretches. *Science (1979)* **2013**, 339 (6115).  
537 <https://doi.org/10.1126/science.1228985>.  
538 (33) Peil, L.; Starosta, A. L.; Lassak, J.; Atkinson, G. C.; Virumäe, K.; Spitzer, M.; Tenson,  
539 T.; Jung, K.; Remme, J.; Wilson, D. N. Distinct XPPX Sequence Motifs Induce  
540 Ribosome Stalling, Which Is Rescued by the Translation Elongation Factor EF-P.  
541 *Proc Natl Acad Sci U S A* **2013**, 110 (38). <https://doi.org/10.1073/pnas.1310642110>.

- 542 (34) Hersch, S. J.; Wang, M.; Zou, S. B.; Moon, K. M.; Foster, L. J.; Ibba, M.; Navarre, W.  
543 W. Divergent Protein Motifs Direct Elongation Factor P-Mediated Translational  
544 Regulation in Salmonella Enterica and Escherichia Coli. *mBio* **2013**, 4 (2).  
545 <https://doi.org/10.1128/mBio.00180-13>.
- 546 (35) Blaha, G.; Stanley, R. E.; Steitz, T. A. Formation of the First Peptide Bond: The  
547 Structure of EF-P Bound to the 70S Ribosome. *Science* (1979) **2009**, 325 (5943).  
548 <https://doi.org/10.1126/science.1175800>.
- 549 (36) Hanawa-Suetsugu, K.; Sekinet, S. I.; Sakai, H.; Hori-Takemoto, C.; Terada, T.; Unzai,  
550 S.; Tame, J. R. H.; Kuramitsu, S.; Shirouzu, M.; Yokoyama, S. Crystal Structure of  
551 Elongation Factor P from Thermus Thermophilus HB8. *Proc Natl Acad Sci U S A* **2004**,  
552 101 (26). <https://doi.org/10.1073/pnas.0308667101>.
- 553 (37) Yanagisawa, T.; Sumida, T.; Ishii, R.; Takemoto, C.; Yokoyama, S. A Paralog of  
554 Lysyl-TRNA Synthetase Aminoacylates a Conserved Lysine Residue in Translation  
555 Elongation Factor P. *Nat Struct Mol Biol* **2010**, 17 (9).  
556 <https://doi.org/10.1038/nsmb.1889>.
- 557 (38) Ojima-Kato, T.; Nagai, S.; Nakano, H. N-Terminal SKIK Peptide Tag Markedly  
558 Improves Expression of Difficult-to-Express Proteins in Escherichia Coli and  
559 Saccharomyces Cerevisiae. *J Biosci Bioeng* **2017**, 123 (5), 540–546.  
560 <https://doi.org/10.1016/j.jbiosc.2016.12.004>.
- 561 (39) Ojima-Kato, T.; Nishikawa, Y.; Furukawa, Y.; Kojima, T.; Nakano, H. Nascent MSKIK  
562 Peptide Cancels Ribosomal Stalling by Arrest Peptides in Escherichia Coli. *Journal of*  
563 *Biological Chemistry* **2023**, 299 (5). <https://doi.org/10.1016/j.jbc.2023.104676>.
- 564 (40) Elgamal, S.; Katz, A.; Hersch, S. J.; Newsom, D.; White, P.; Navarre, W. W.; Ibba, M.  
565 EF-P Dependent Pauses Integrate Proximal and Distal Signals during Translation.  
566 *PLoS Genet* **2014**, 10 (8). <https://doi.org/10.1371/journal.pgen.1004553>.
- 567 (41) Aledo, J. C. Renz: An R Package for the Analysis of Enzyme Kinetic Data. *BMC*  
568 *Bioinformatics* **2022**, 23 (1). <https://doi.org/10.1186/s12859-022-04729-4>.
- 569 (42) Pavlov, M. Y.; Ehrenberg, M. Rate of Translation of Natural MRNAs in an Optimized in  
570 Vitro System. *Arch Biochem Biophys* **1996**, 328 (1).  
571 <https://doi.org/10.1006/abbi.1996.0136>.
- 572 (43) Sharma, A. K.; Sormanni, P.; Ahmed, N.; Ciryam, P.; Friedrich, U. A.; Kramer, G.;  
573 O'Brien, E. P. A Chemical Kinetic Basis for Measuring Translation Initiation and  
574 Elongation Rates from Ribosome Profiling Data. *PLoS Comput Biol* **2019**, 15 (5).  
575 <https://doi.org/10.1371/journal.pcbi.1007070>.
- 576 (44) Correction to: The Impact of Ribosomal Interference, Codon Usage, and Exit Tunnel  
577 Interactions on Translation Elongation Rate Variation (PLOS Genetics, (2018), 14, 1,

578 (E1007166), 10.1371/Journal.Pgen.1007166). *PLoS Genetics*. 2018.  
579 <https://doi.org/10.1371/journal.pgen.1007620>.  
580 (45) Pedersen, S. Escherichia Coli Ribosomes Translate in Vivo with Variable Rate.  
581 *EMBO J* **1984**, 3 (12). <https://doi.org/10.1002/j.1460-2075.1984.tb02227.x>.  
582 (46) Huter, P.; Arenz, S.; Bock, L. V.; Graf, M.; Frister, J. O.; Heuer, A.; Peil, L.; Starosta, A.  
583 L.; Wohlgemuth, I.; Peske, F.; Nováček, J.; Berninghausen, O.; Grubmüller, H.;  
584 Tenson, T.; Beckmann, R.; Rodnina, M. V.; Vaiana, A. C.; Wilson, D. N. Structural  
585 Basis for Polyproline-Mediated Ribosome Stalling and Rescue by the Translation  
586 Elongation Factor EF-P. *Mol Cell* **2017**, 68 (3).  
587 <https://doi.org/10.1016/j.molcel.2017.10.014>.  
588 (47) Wilkins, M. R.; Gasteiger, E.; Bairoch, A.; Sanchez, J. C.; Williams, K. L.; Appel, R. D.;  
589 Hochstrasser, D. F. Protein Identification and Analysis Tools in the ExPASy Server.  
590 *Methods in molecular biology (Clifton, N.J.)*. 1999.  
591 <https://doi.org/10.1385/1-59259-584-7:531>.  
592  
593

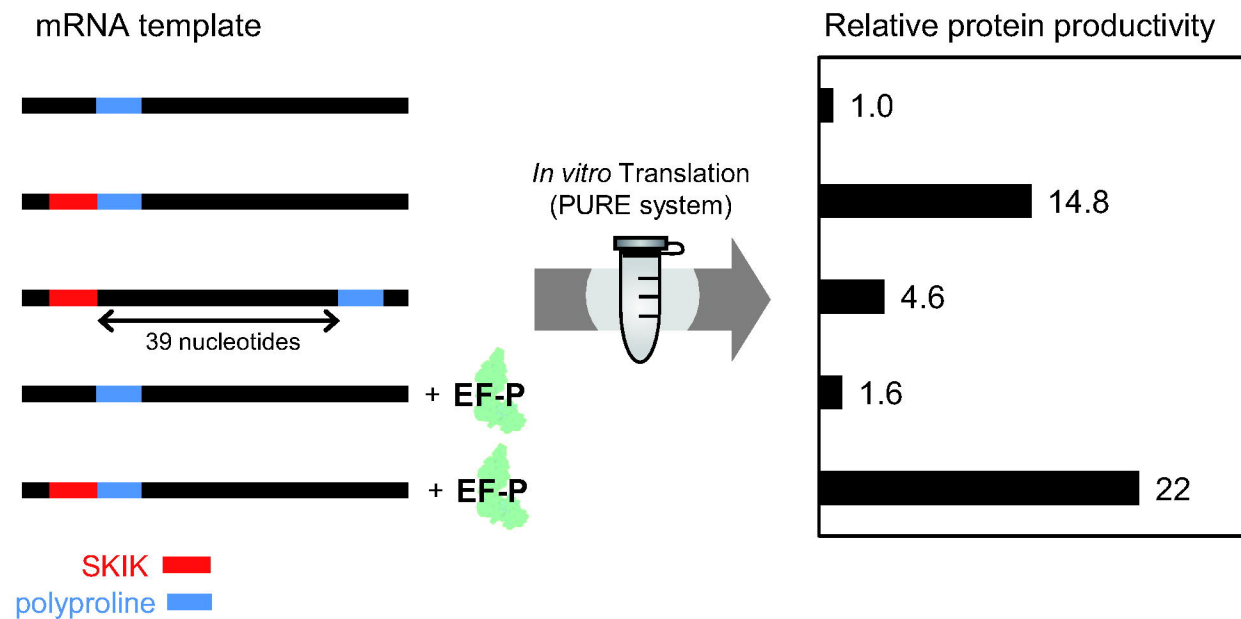

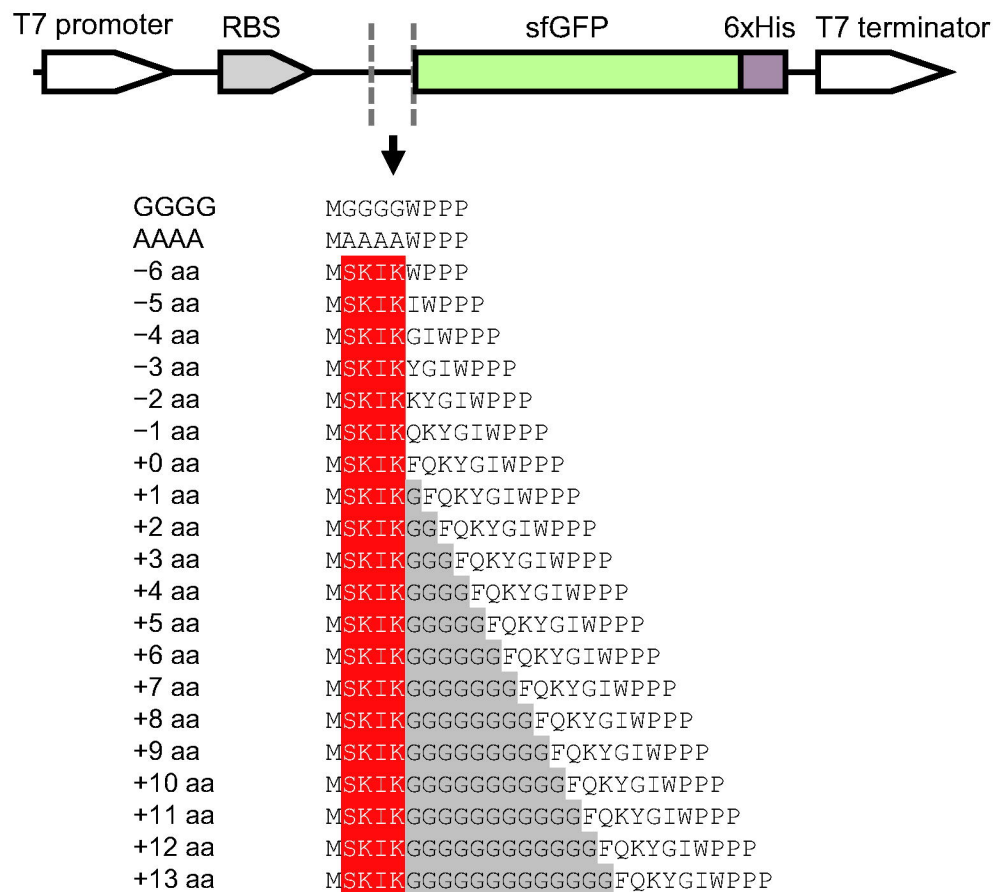

Figure 1



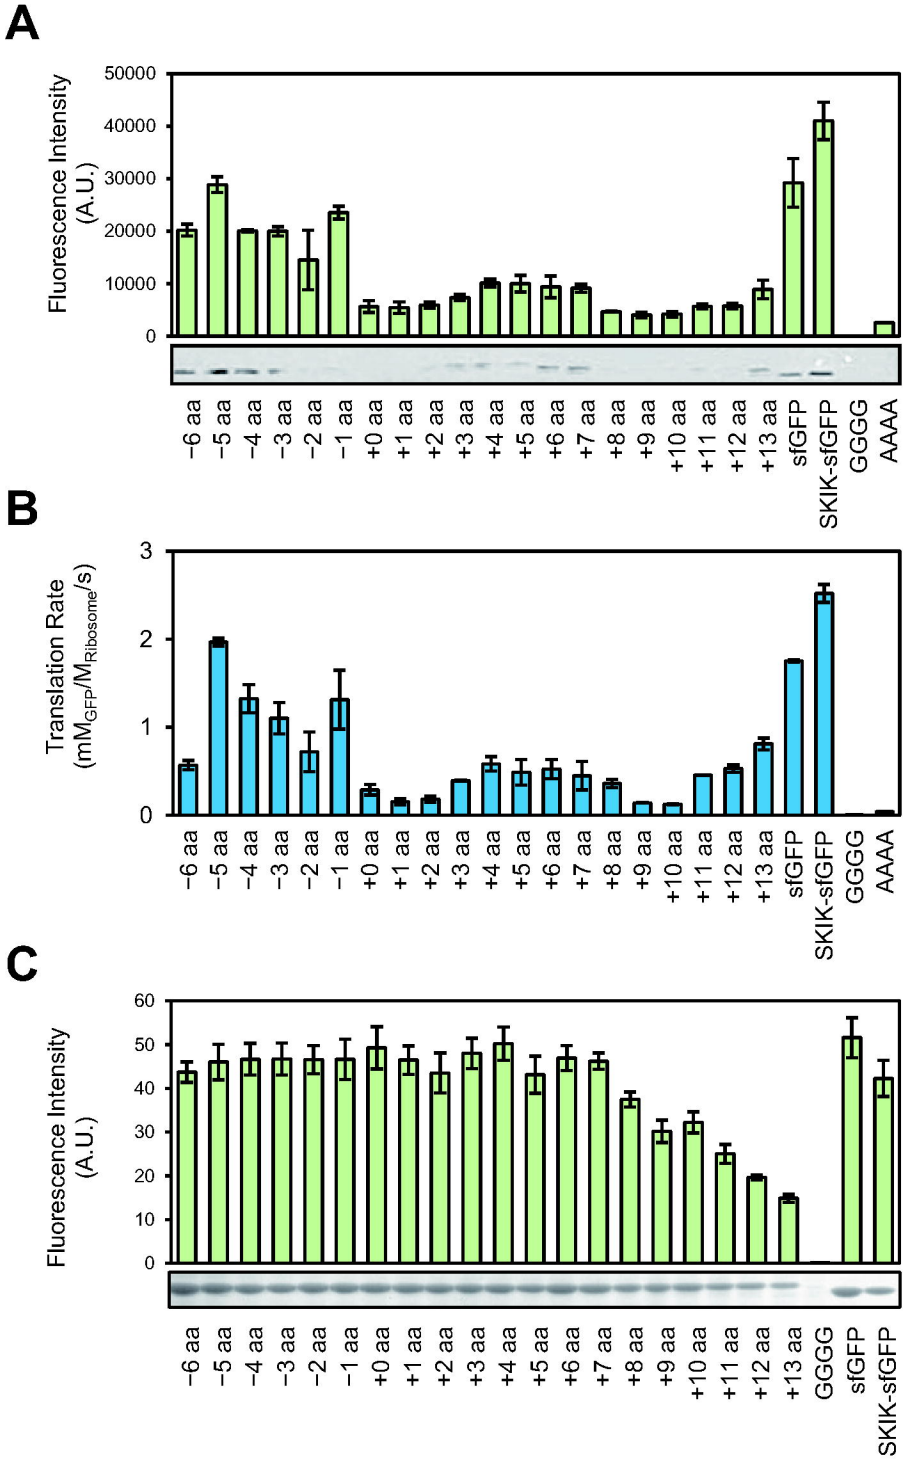

Figure 2

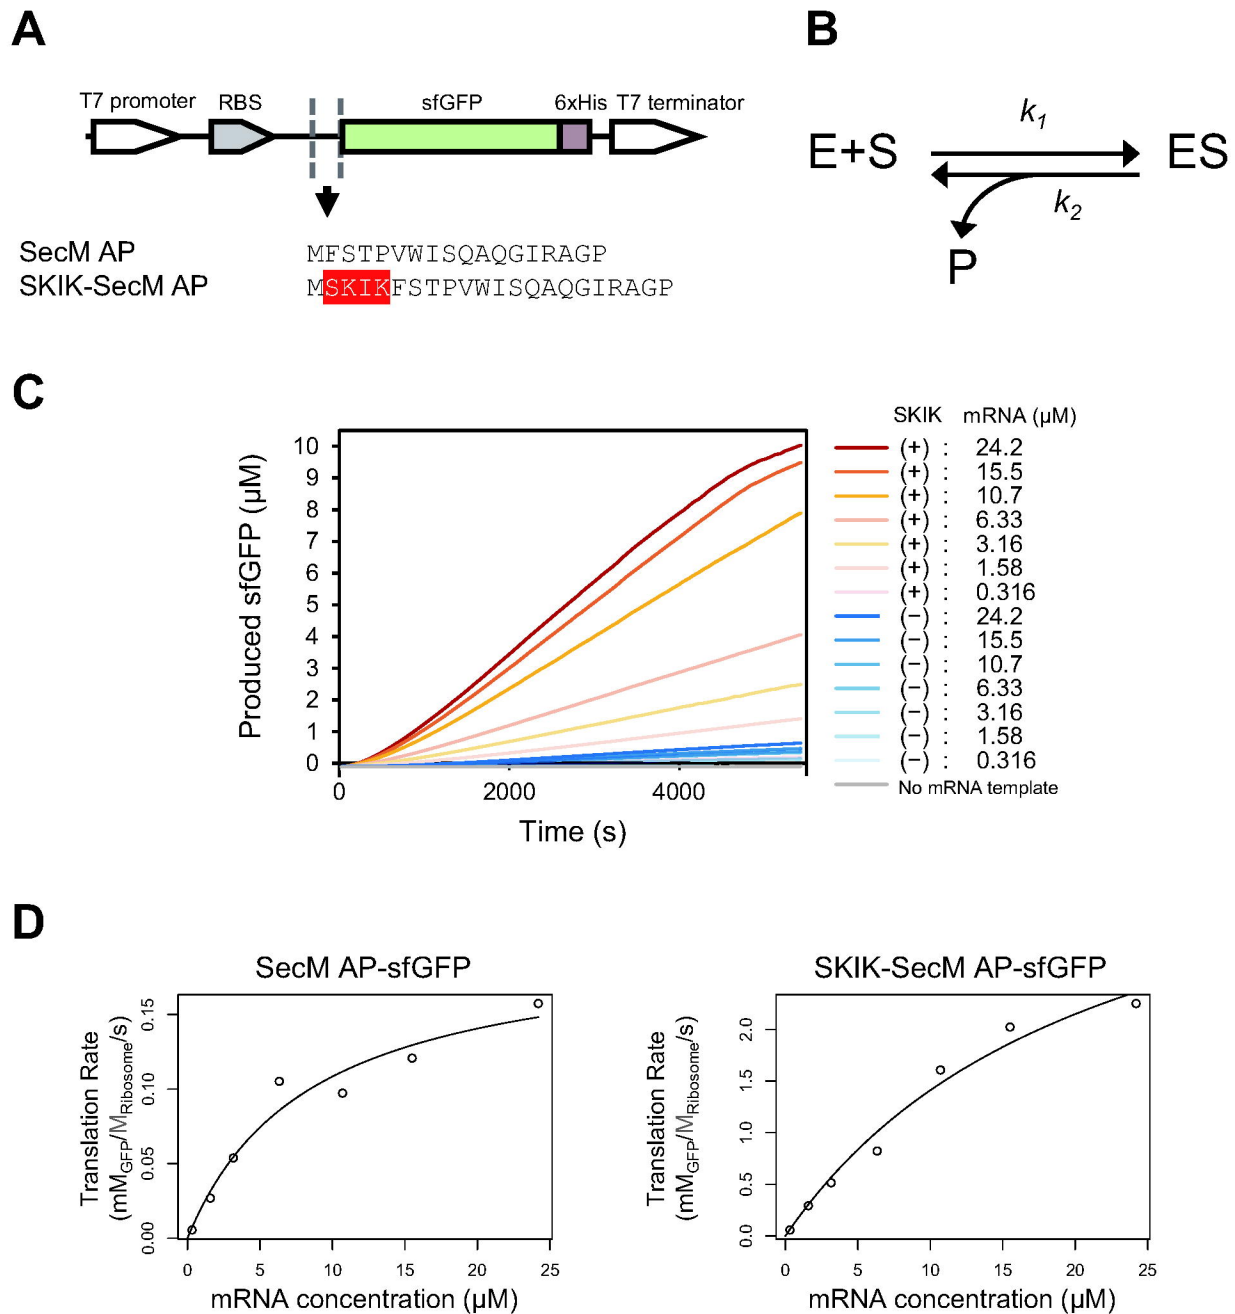

Figure 3

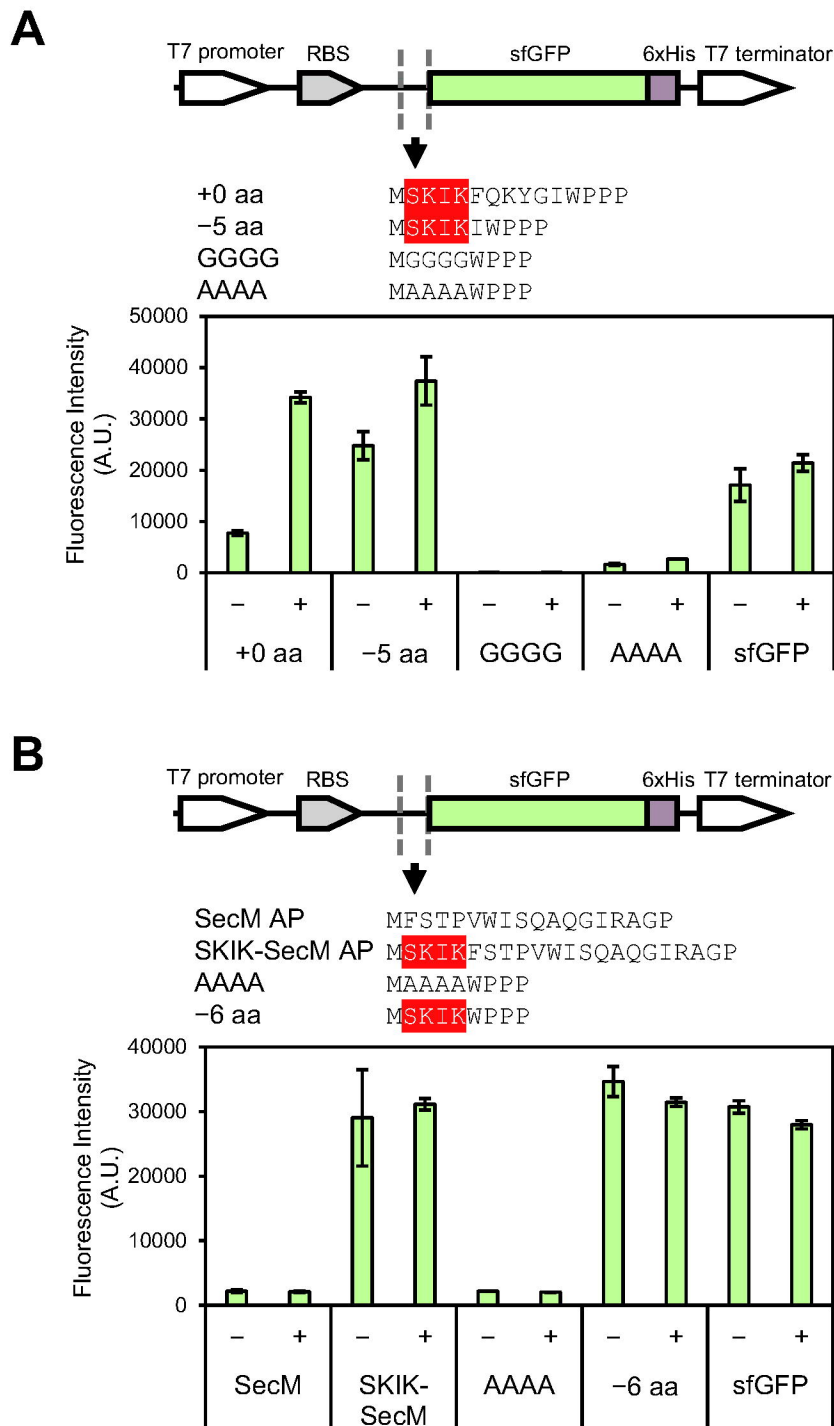

Figure 4
